# Supplementary material
Source: PubMed Central journal article supplement (PMC1785287)
Supplement: pnas_0610354104_1.pdf [file pnas_0610354104_1.pdf]

**Table 2. Detailed information for 27 new and previously predicted introns**

| Gene    | ORF       | Origin     | Size in bases |        |             | Sequence |                |             |                |         |
|---------|-----------|------------|---------------|--------|-------------|----------|----------------|-------------|----------------|---------|
|         |           |            | Exon 1        | Intron | brpt-exon 2 | Exon 1   | 5' splice site | Branch site | 3' splice site | Exon 2  |
| BMH2    | YDR099W   | This study | 72            | 743    | 98          | CGAACC   | GTATGT         | TACTAAC     | CAG            | AAGGTT  |
| CGI121  | YML036W   | This study | 446           | 106    | 42          | AGAAAA   | GTATGT         | TACTAAC     | TAG            | ATCTAT  |
| GIM4    | YEL003W   | This study | 38            | 88     | 28          | ACAACG   | GTATGC         | TACTAAC     | TAG            | TCTTTC  |
| HPC2    | YBR215W   | This study | 29            | 84     | 19          | AAAAAG   | GTATGT         | GATTAAC     | TAG            | CAATTG  |
| HRB1    | YNL004W   | This study | 66            | 342    | 19          | GAAAAAC  | GTATGT         | TACTAAT     | TAG            | AATAAT  |
| MCR1    | YKL150W   | This study | 27            | 88     | 14          | AGAGAG   | GTACGT         | TACTAAC     | CAG            | CCAAAC  |
| PTC7    | YHR076W   | This study | 66            | 93     | 18          | TTTATG   | GTATGT         | GACTAAC     | TAG            | GATCCT  |
| URA2    | YJL130C   | This study | 195           | 320    | 22          | ATTTGA   | GTATGT         | TACTAAC     | TAG            | AAATCC  |
| YPR153W | YPR153W   | This study | 34            | 134    | 45          | TATGAG   | GTATGT         | AACTAAC     | CAG            | ATCATT  |
| ARF2    | YDL137W   | Ref. 1     | 61            | 332    | 18          | CACITT   | GTATGT         | TACTAAC     | TAG            | AGATAA  |
| COX4    | YGL187C   | Ref. 1     | 122           | 342    | 43          | TGAAAT   | GTATGT         | TACTAAC     | TAG            | ATAACA  |
| IWR1    | YDL115C   | Ref. 1     | 23            | 70     | 25          | CATTAT   | GTATGT         | GACTAAC     | CAG            | TAATTG  |
| NHP6B   | YBR089C-A | Ref. 1     | 40            | 357    | 14          | CGCAA    | GTATGT         | TACTAAC     | TAG            | AACATT  |
| RPL24A  | YGL031C   | Ref. 1     | 43            | 456    | 45          | TGAGAG   | GTATGT         | TACTAAC     | TAG            | TGATAA  |
| RPL24B  | YGR148C   | Ref. 1     | 29            | 392    | 66          | TGAAAC   | GTATGT         | TACTAAC     | TAG            | AAGAAC  |
| RPL29   | YFR032C-A | Ref. 2     | 22            | 331    | 50          | TAGAAA   | GTACGT         | TACTAAC     | CAG            | AAAAATG |
| RPL32   | YBL092W   | Ref. 1     | 40            | 333    | 39          | ATAAAA   | GTATGT         | TACTAAC     | TAG            | ATGGCC  |
| RPS25A  | YGR027C   | Ref. 1     | 25            | 312    | 34          | TTTAGT   | GTATGT         | TACTAAC     | TAG            | AACATT  |
| RPS25B  | YLR333C   | Ref. 2     | 28            | 423    | 32          | ATTAAG   | GTATGT         | CACTAAC     | CAG            | AACATA  |
| RPS26A  | YGL189C   | Ref. 2     | 13            | 368    | 56          | TAAAGTA  | GTATGT         | TACTAAC     | TAG            | ATCATT  |
| RPS26B  | YER131W   | Ref. 2     | 21            | 361    | 34          | GGAAAA   | GTATGT         | TACTAAC     | TAG            | ATGCCA  |
| RPS29A  | YLR388W   | Ref. 2     | 25            | 488    | 22          | ATTAGG   | GTATGT         | TACTAAC     | CAG            | ATAAAA  |
| RPS29B  | YDL061C   | Ref. 2     | 10            | 409    | 39          | CTAAAT   | GTATGT         | TACTAAC     | TAG            | AATATA  |
| RPS8A   | YBL072C   | Ref. 1     | 19            | 308    | 29          | CAAAA    | GTATGT         | TACTAAC     | CAG            | TTACAA  |

| RPS8B | YER102W | Ref. 2 | 19  | 360 | 24 | TAAAAAC | GTATGT | TACTAAC | TAG | TGTA AAA |
|-------|---------|--------|-----|-----|----|---------|--------|---------|-----|----------|
| SIM1  | YIL123W | Ref. 3 | 275 | 487 | 31 | TTTTTA  | GTAAGT | TACTAAC | CAG | AAATGA   |
| SUN4  | YNL066W | Ref. 3 | 225 | 346 | 22 | CAAGTC  | GTATGT | TACTAAC | TAG | TAATTT   |

Gene, the common gene name; Origin, the source of evidence for the intron: this study, Spingola *et al.* (1), Planta *et al.* (2), and Lopez *et al.* (3). The sizes in bases are presented for the first exon (exon 1), the intron (intron), and the distance from the branchpoint adenosine to second exon (brpt-exon 2). Sequences are provided for three conserved regions: the 5'-splice site, the branch site, and the 3'-splice site. The exonic sequences that flank the intron are provided for both exons 1 and 2.

1. Spingola M, Grate L, Haussler D, Ares M, Jr (1999) *RNA* 5:221-234.
2. Planta RJ, Mager WH (1998) *Yeast* 14:471-477.
3. Lopez PJ, Seraphin B (2000) *Nucleic Acids Res* 28:85-86.
